# Supplementary material
Source: PubMed Central journal article supplement (PMC3131380)
Supplement: 1107899108_pnas.201107899SI.pdf [file 1107899108_pnas.201107899SI.pdf]

# Supporting Information

Norton et al. 10.1073/pnas.1107899108

## SI Materials and Methods

**Mice.** Six- to 8-wk-old female C57BL/6 were purchased from Charles River Laboratory. C3H/HeJ (TLR4-deficient strain), C3H/HeOJ (TLR4 normal strain), and *Il1r1*<sup>-/-</sup> mice were obtained from The Jackson Laboratories. *Tlr4*<sup>-/-</sup>, *Tlr7*<sup>-/-</sup>, *Tlr9*<sup>-/-</sup>, and *Myd88*<sup>-/-</sup> mice were gifts from Shizuo Akira (1) and were maintained on a C57BL/6 background at the University of California San Diego. All animal protocols received prior approval by the institutional review board.

**Reagents.** Zoledronate (ZLD, AK Scientific), alendronate (ALD), and clodronate (Sigma) were endotoxin-free as determined by the Limulus Amebocyte Lysate test (Charles River Laboratory). In vitro stimulation studies were performed with the indicated doses of LPS (Sigma), heparan sulfate (Sigma), IL-1 $\alpha$  (eBioscience), TLR7 ligand [1V136; synthesized as previously described (2)], Pam3CSK4 (Invivogen) and poly(I:C) (Invivogen), and single-stranded phosphorothioate immunostimulatory oligonucleotide (Tri-Link Biotechnology) (3). Human peripheral blood mononuclear cells (PBMCs) were isolated from buffy coats obtained from the San Diego Blood Bank.

**In Vivo Models.** In the peritonitis model, mice were injected intraperitoneally with the 0.8 mg/mouse ALD in 100  $\mu$ L vehicle (PBS). Peritoneal cells were recovered by lavage with 3 mL cold PBS. Cells were counted with a Guava Personal Cytometer (Millipore) and differentiated by Wright-Giemsa staining or by flow cytometry. Bone marrow chimeras were generated as described previously (4). For adjuvant studies, WT mice were injected subcutaneously in the flank with 10  $\mu$ g ZLD and/or 30  $\mu$ g ovalbumin in 200  $\mu$ L vehicle. Antigen-specific IgG levels as well as antigen specific IFN- $\gamma$  secretion by splenocytes were determined as described previously (5).

**In Vitro Cytokine Assays.** Bone marrow-derived macrophages (BMDM) and human PBMCs were prepared as described pre-

viously (5). BMDM ( $1.5 \times 10^5$  per well in 96-well plates) or human PBMCs ( $2.5 \times 10^5$  per well in 96-well plates) were pretreated with nitrogen bisphosphonates (first treatment), followed by additional LPS or other Toll-like receptor ligands for another 24 h. In the indicated experiment, farnesyl-pyrophosphate (Sigma) was added during the first treatments as indicated. Mesothelial cells were isolated as previously described (6). The mesothelial cells ( $1 \times 10^4$  per well in 96-well plates) were pretreated with vehicle or 10  $\mu$ M ZLD followed by murine IL-1 $\alpha$  for an additional 24 h. Harvested supernatants were assayed for murine IL-6 and KC, human IL-8 (BD Bioscience), and murine IFN- $\gamma$  (Antigenix America) by ELISA.

**Quantitative RT-PCR.** RNA was isolated and levels of transcripts were determined as previously described (7). The following primer sets and probes were used in the experiment: 5'-TGCCTTCATTTATCCCTTGAA-3' (forward), 5'-TTACTACATT-CAGCCAAAAG-3' (reverse), and 5'-TCTGGTCC-3' (probe) for IL-6; 5'-GGACATTCGAAACCAAGCAT-3' (forward), 5'-CCAGTGCCTTCTTTAGTTGCATT-3' (reverse) and 5'-TTC-TCCTG-3' (probe) for IRAK-M; 5'-ACCAGAGGCATACAG-GGACA-3' (forward), 5'-CTAAGGCCAACCGTGAAAAG-3' (reverse) and 5'-CAGCCTGG-3' (probe) for  $\beta$ -actin.

**Immunoblot.** Lysates from treated BMDM were immunoblotted for IL-1 receptor-associated kinase-M (IRAK-M), IRAK-1 (Abcam), JNK and phospho-JNK (Cell Signaling), and  $\beta$ -actin (Sigma) (4).

**Statistics.** The statistical differences for multiple comparisons were analyzed by one-way ANOVA with Dunnett's or Bonferroni post hoc test, as indicated. Analyses for pair-wise comparisons were made using Mann-Whitney *U* tests. All analyses were performed using Prism software (version 5.0, GraphPad Software, Inc.). A value of  $P < 0.05$  was considered statistically significant.

1. Coban C, et al. (2010) Immunogenicity of whole-parasite vaccines against *Plasmodium falciparum* involves malarial hemozoin and host TLR9. *Cell Host Microbe* 7:50–61.
2. Lee J, et al. (2006) Activation of anti-hepatitis C virus responses via Toll-like receptor 7. *Proc Natl Acad Sci USA* 103:1828–1833.
3. Hayashi T, et al. (2004) Inhibition of experimental asthma by indoleamine 2,3-dioxygenase. *J Clin Invest* 114:270–279.
4. Hayashi T, et al. (2009) Prevention of autoimmune disease by induction of tolerance to Toll-like receptor 7. *Proc Natl Acad Sci USA* 106:2764–2769.
5. Chan M, et al. (2009) Synthesis and immunological characterization of toll-like receptor 7 agonistic conjugates. *Bioconjug Chem* 20:1194–1200.
6. Bot J, et al. (2003) Culturing mouse peritoneal mesothelial cells. *Pathol Res Pract* 199:341–344.
7. Hayashi T, et al. (2008) Mast cell-dependent anorexia and hypothermia induced by mucosal activation of Toll-like receptor 7. *Am J Physiol Regul Integr Comp Physiol* 295:R123–R132.
